# Supplementary material for: Therapeutic Potential of Bromodomain and Extra-Terminal Domain Inhibitors for Synovial Sarcoma Cells
Source: MDPI journal article supplement (doi:10.3390/cancers16061125), 2024-03-11

Figure 1C.

CC3

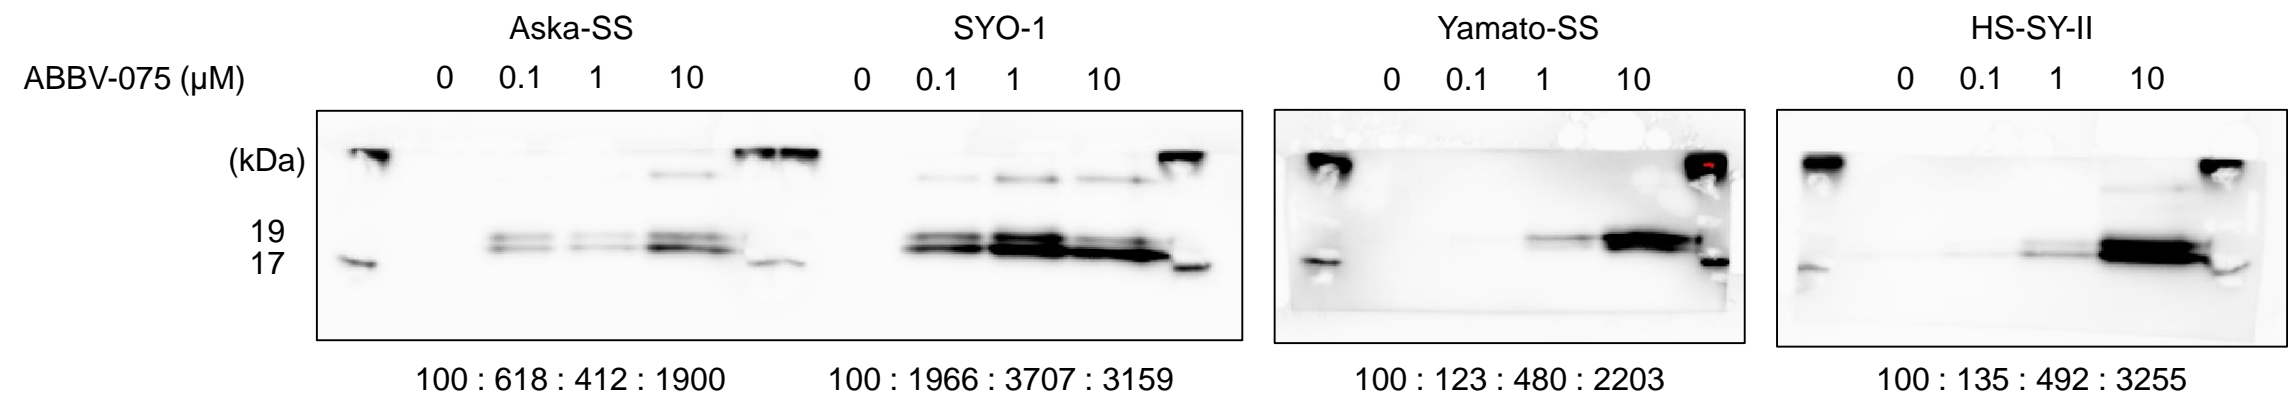

$\beta$ -Actin

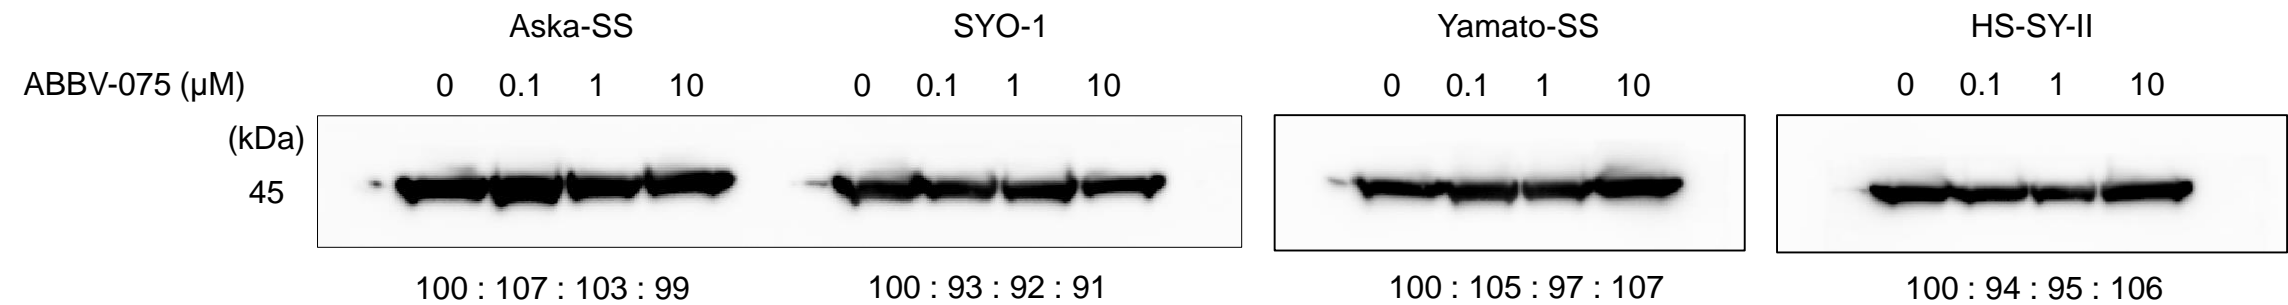

Figure 3B.

MYC

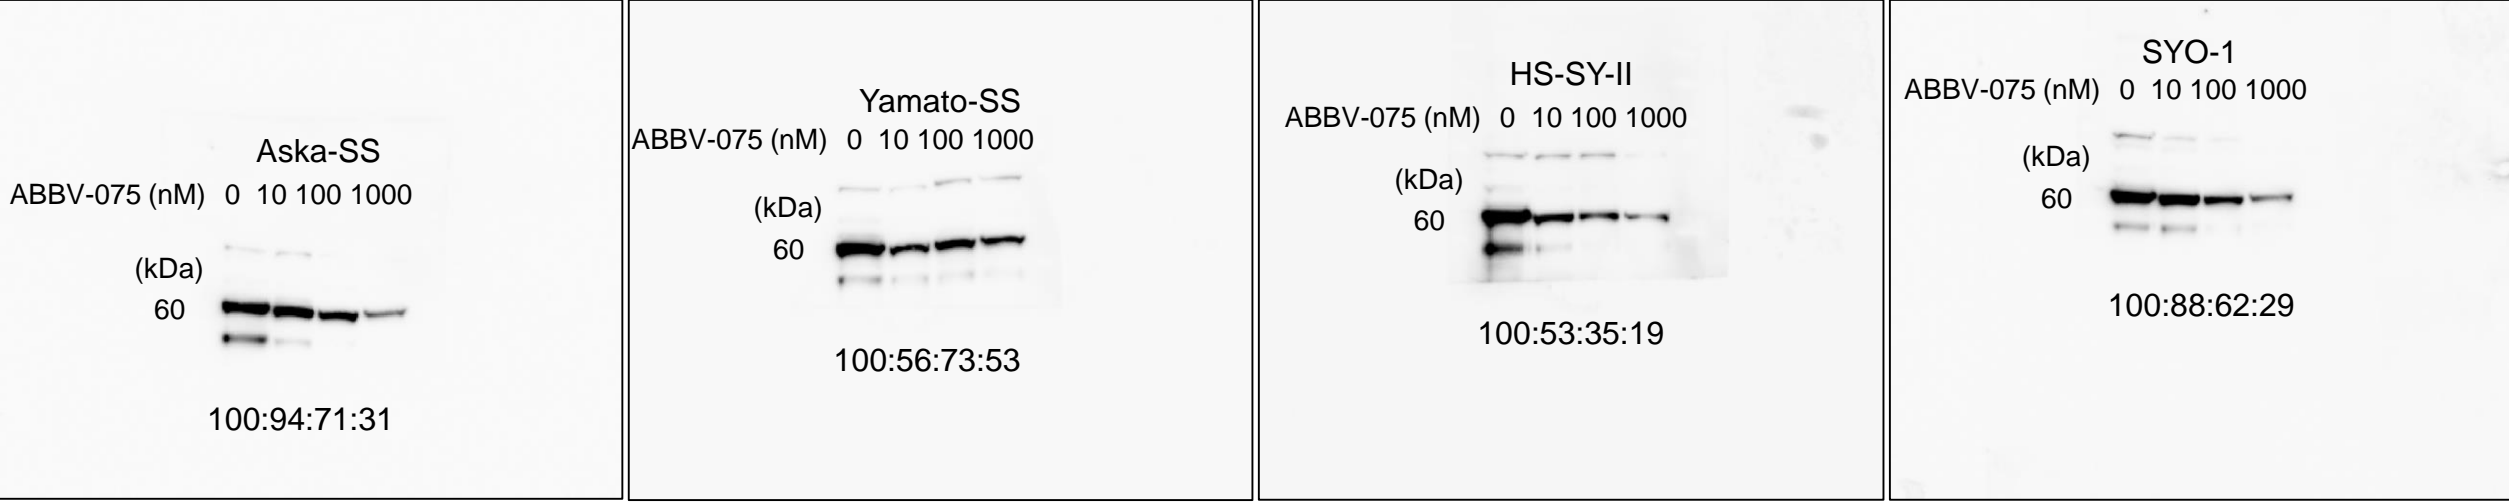

p53

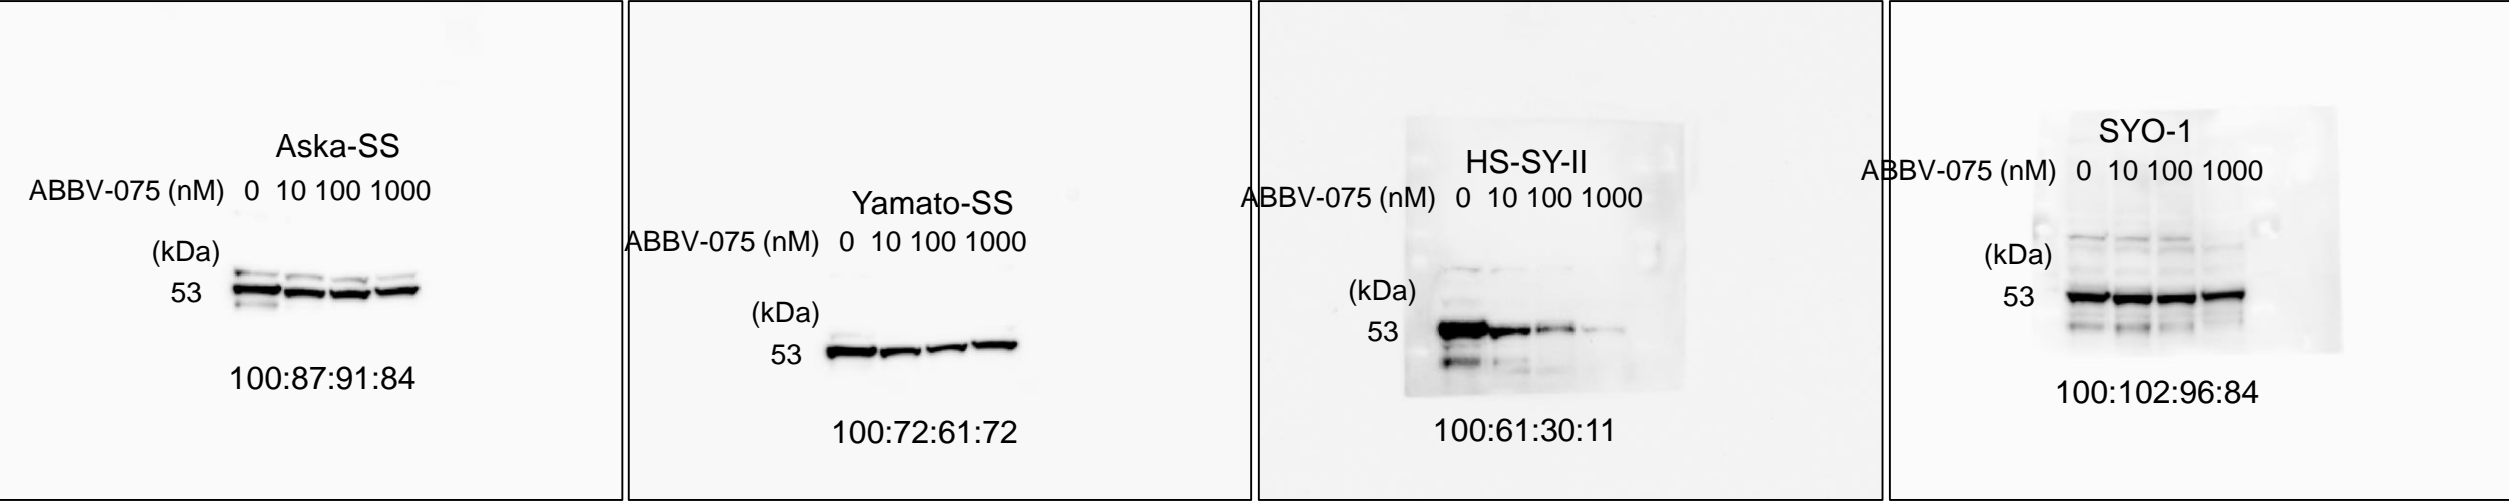

Figure 3B.

p21

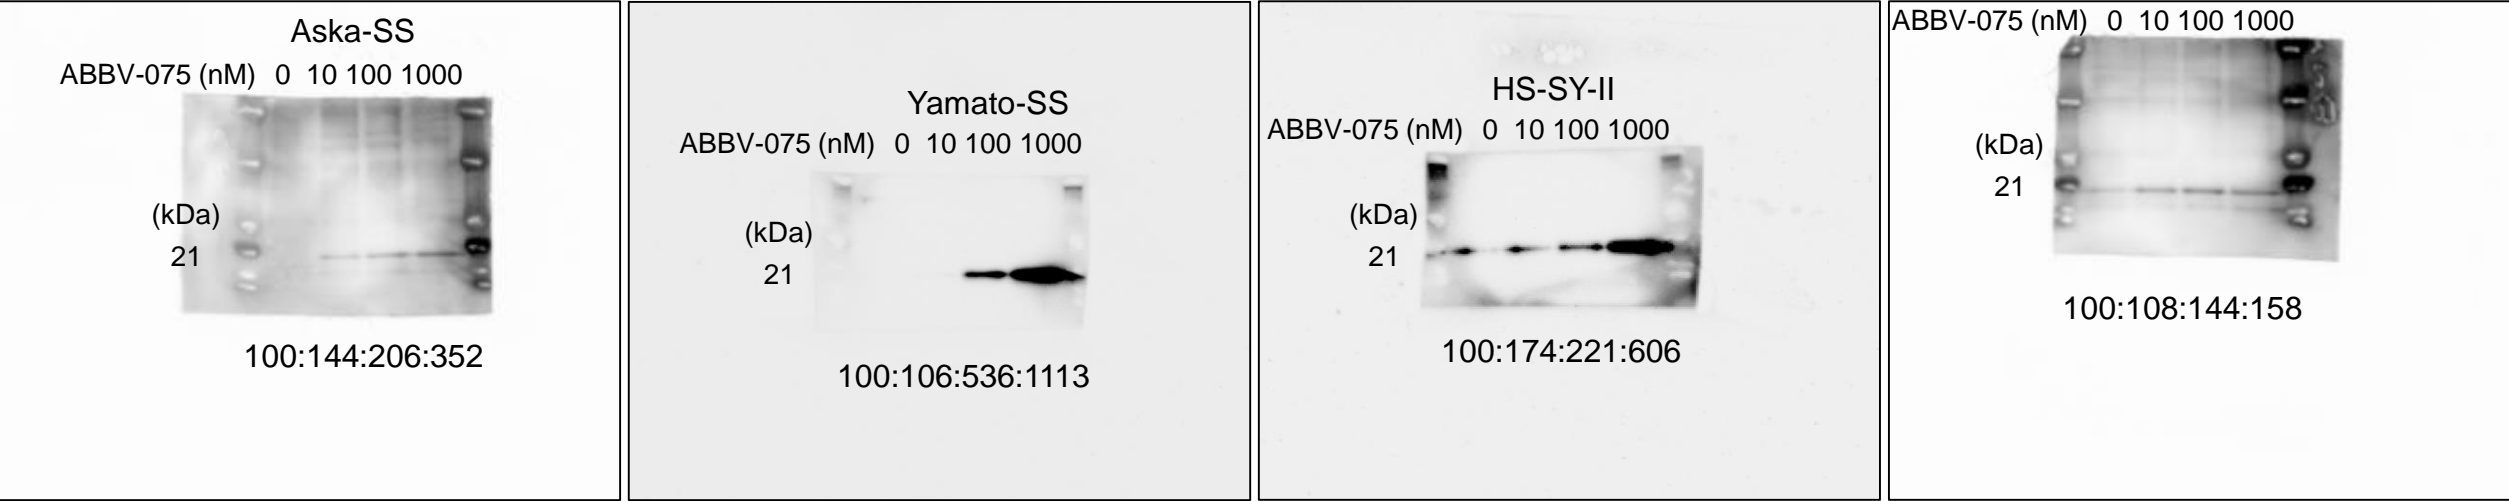

CCND1

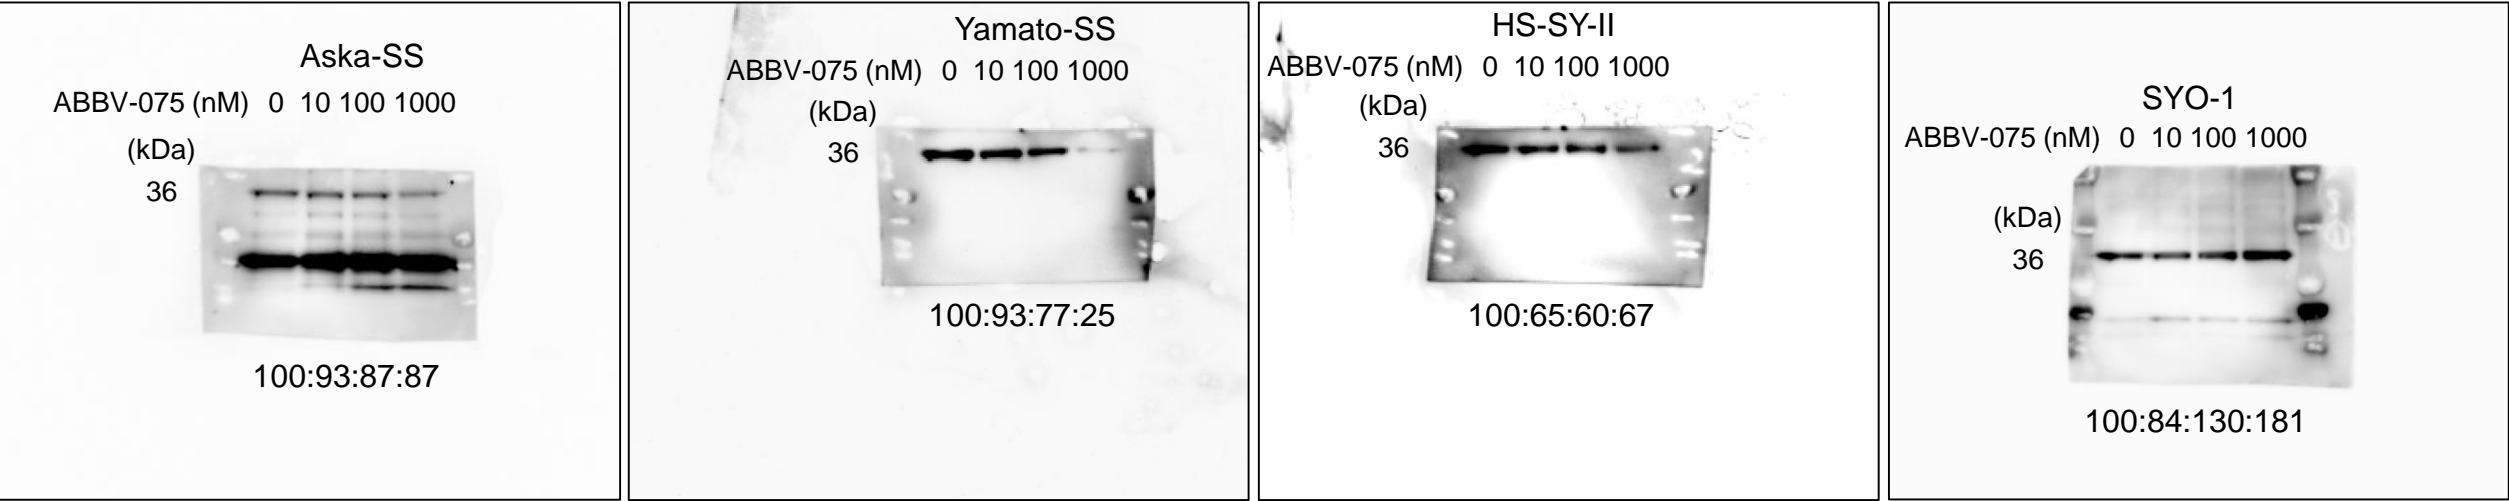

Figure 3B.

CDK4

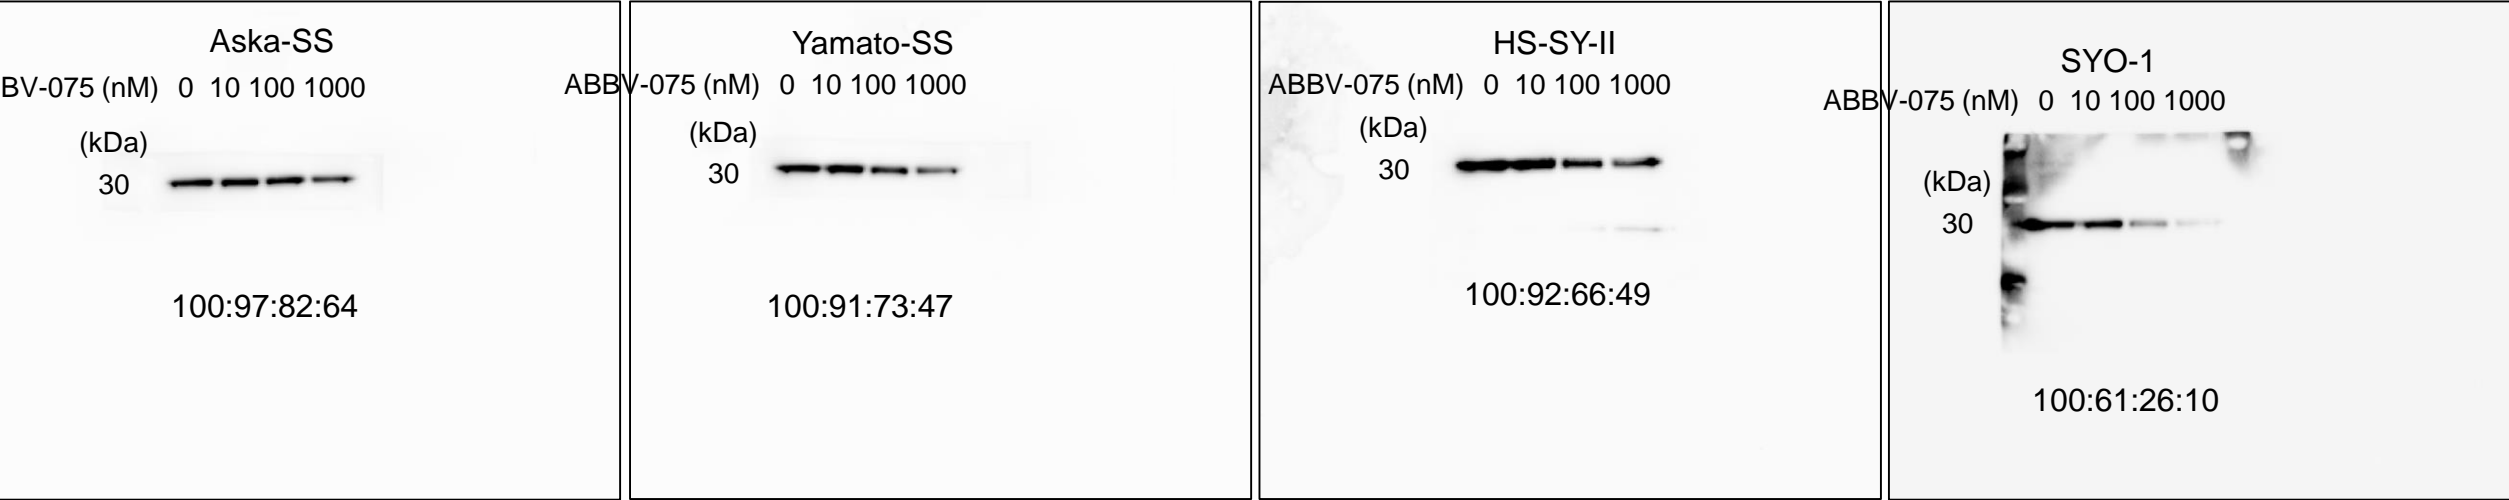

CDK6

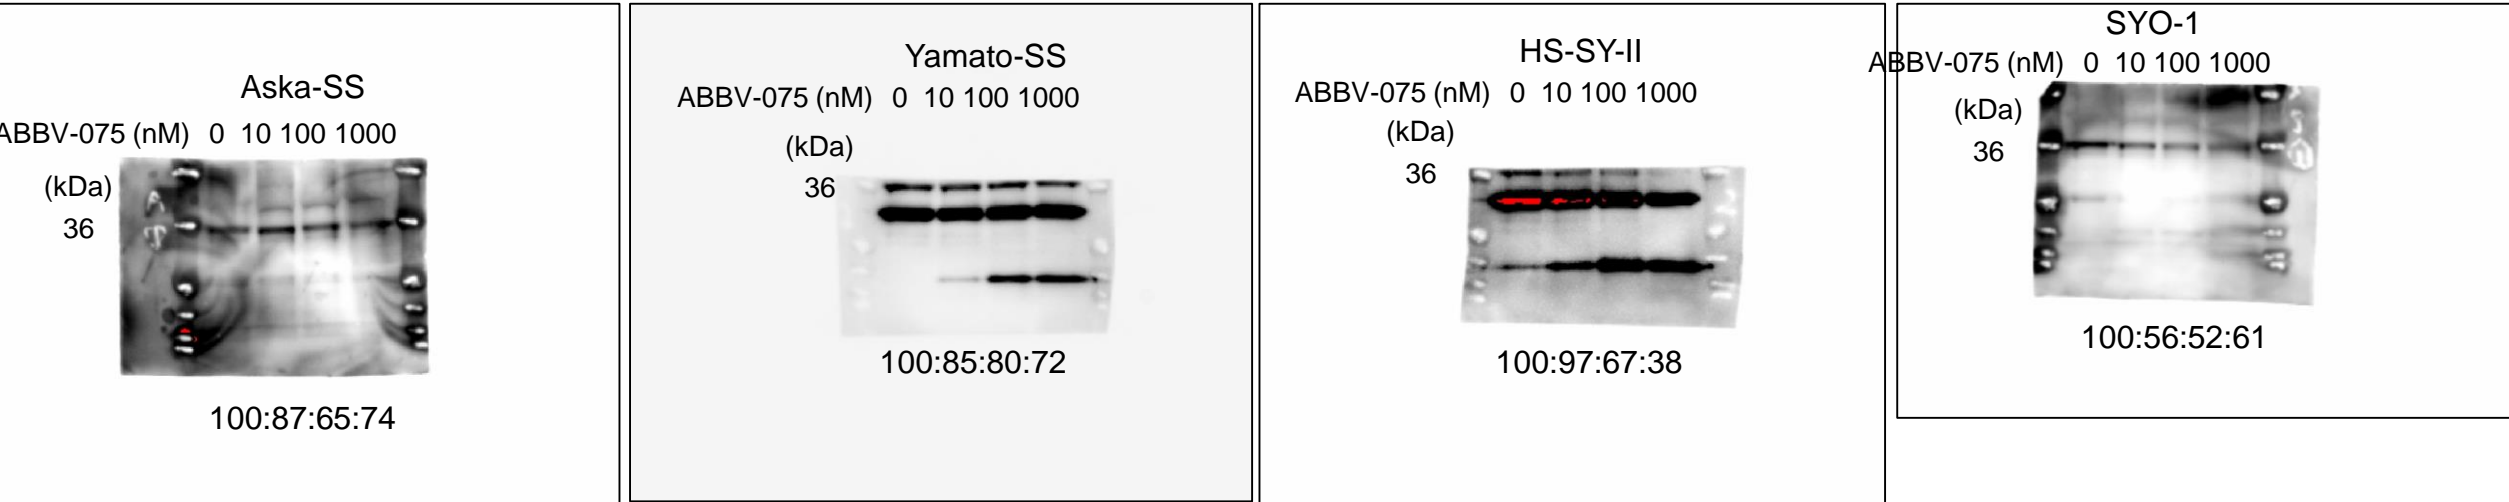

Figure 3B.

$\beta$ -Actin

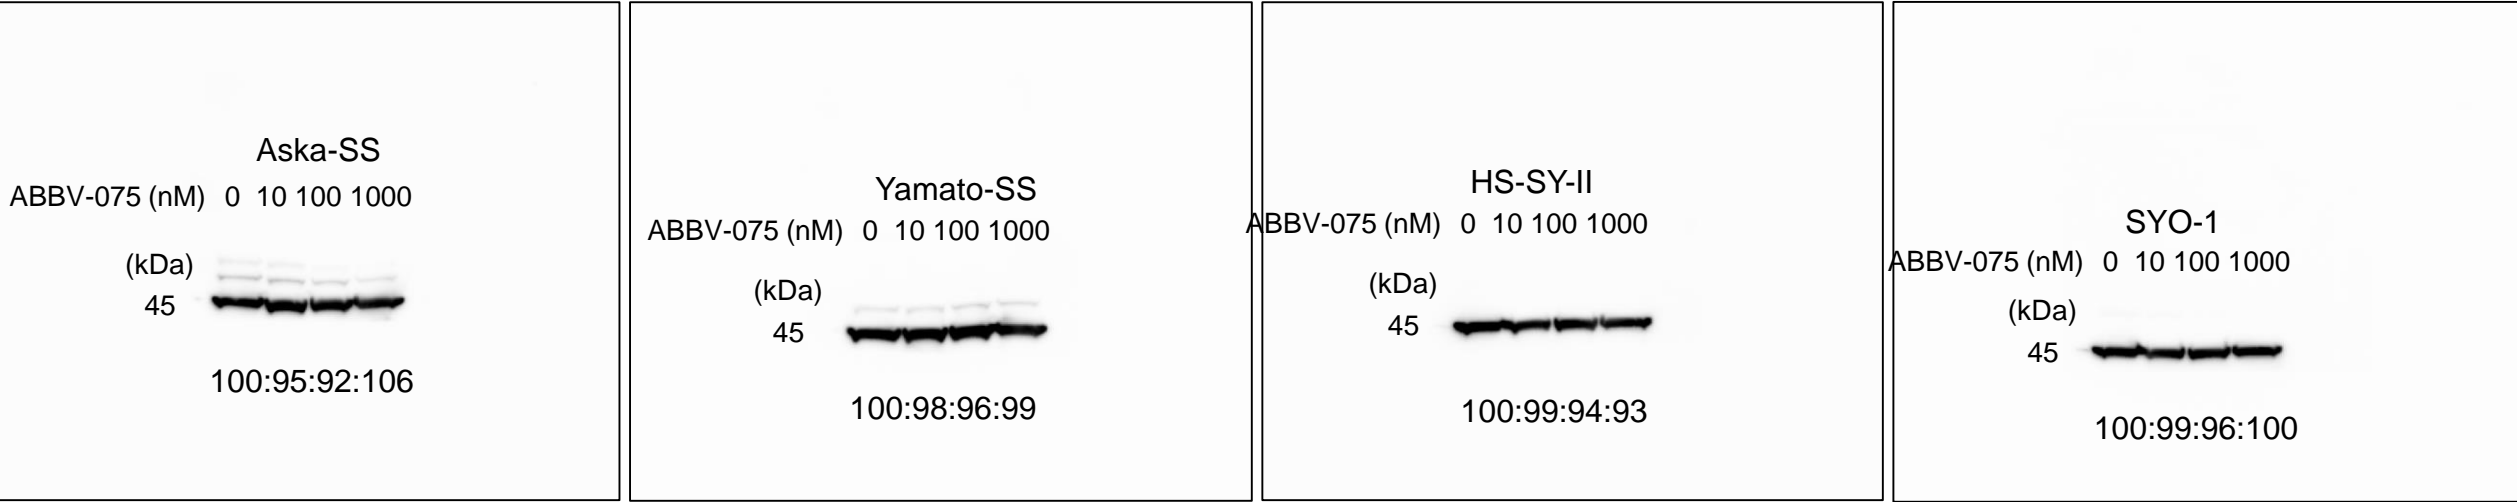

Figure 4D.

BCL2

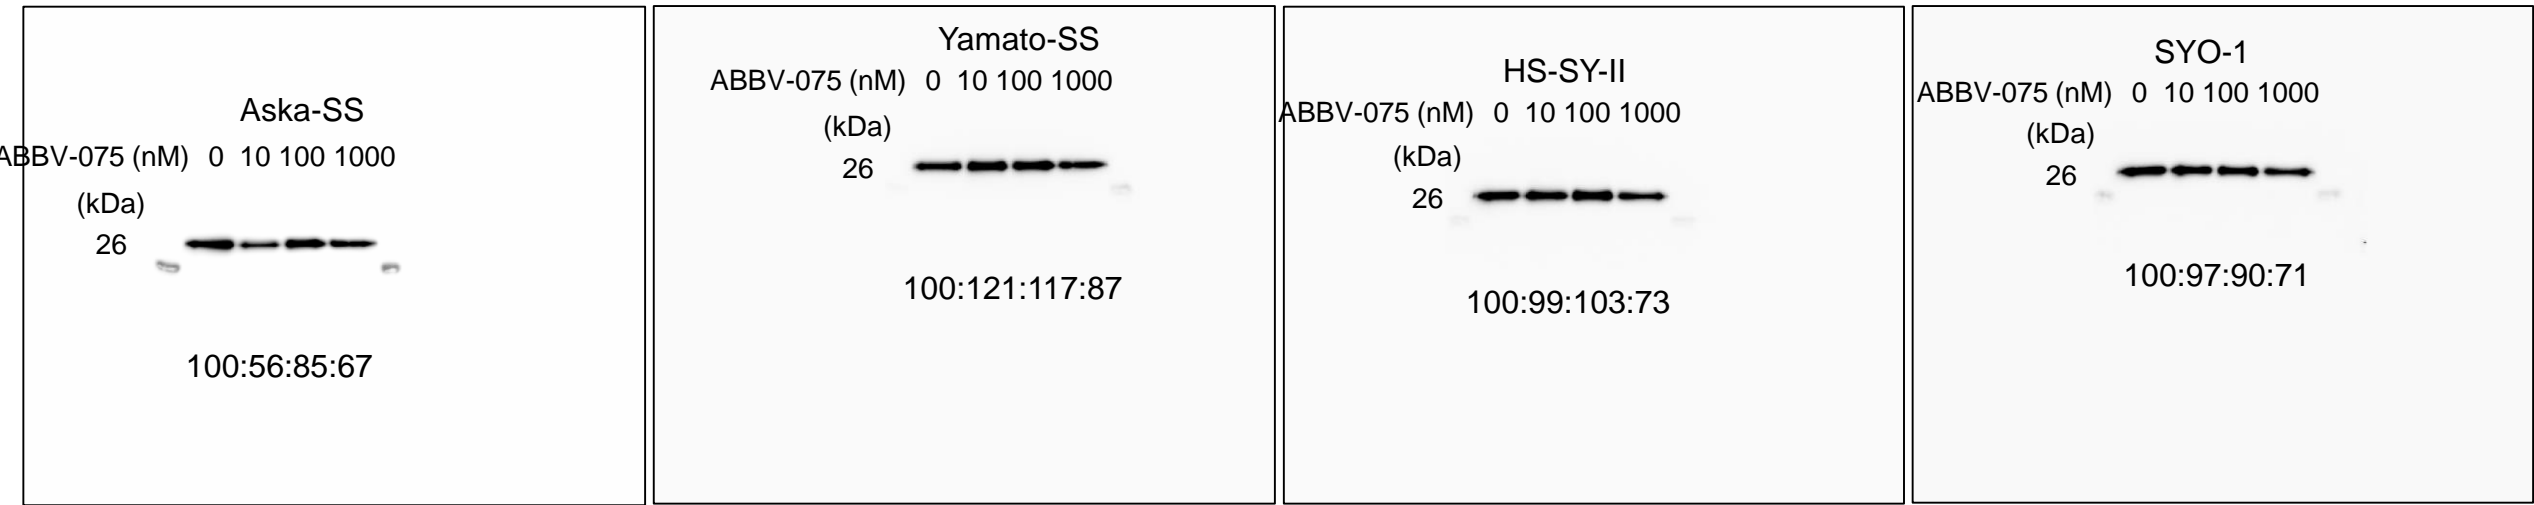

BCLxL

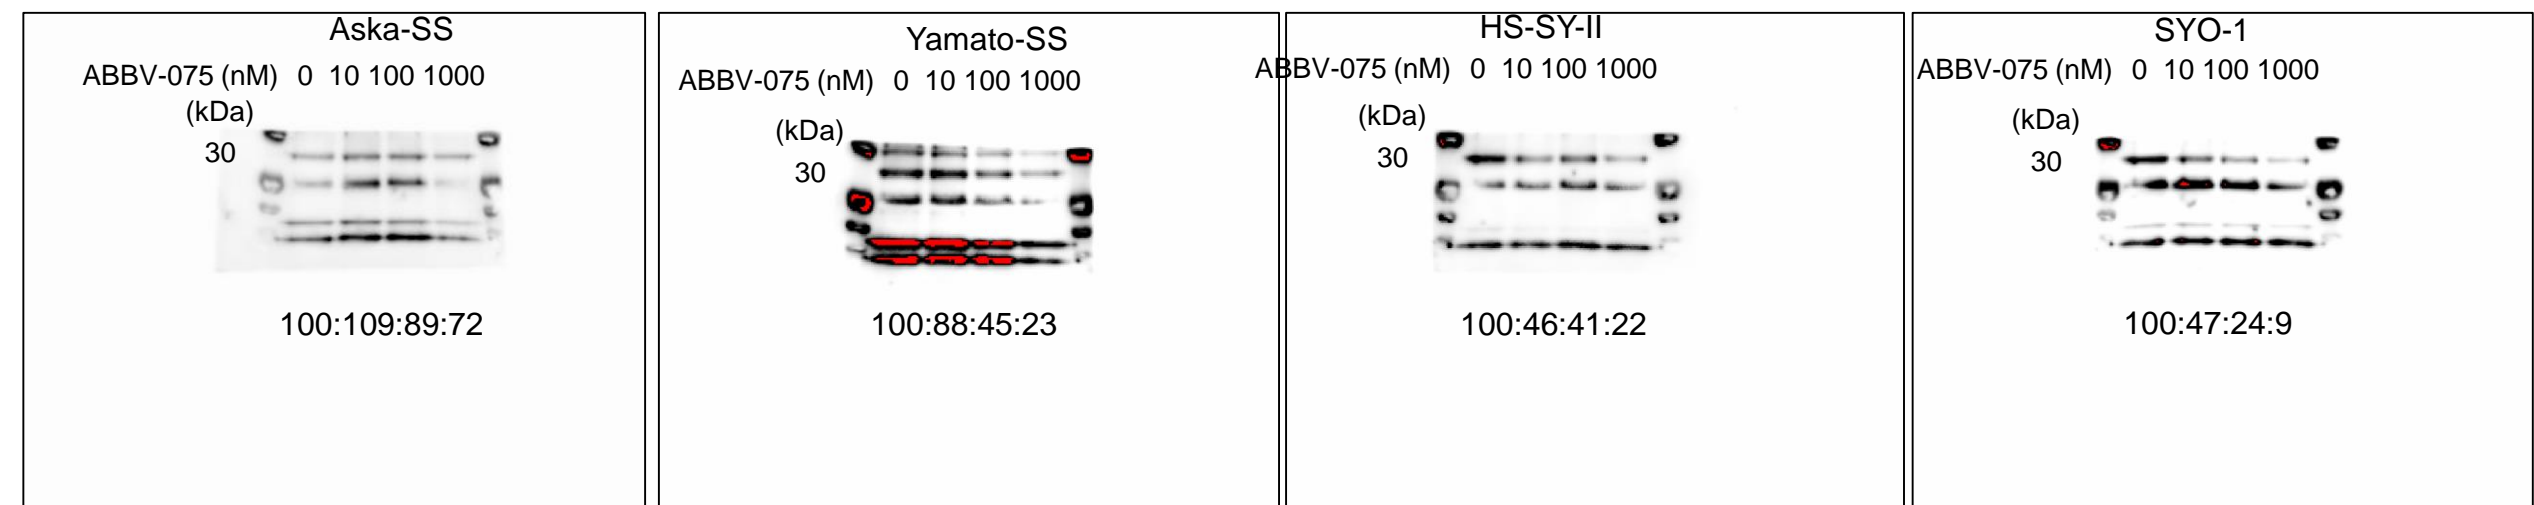

Figure 4D.

BIM

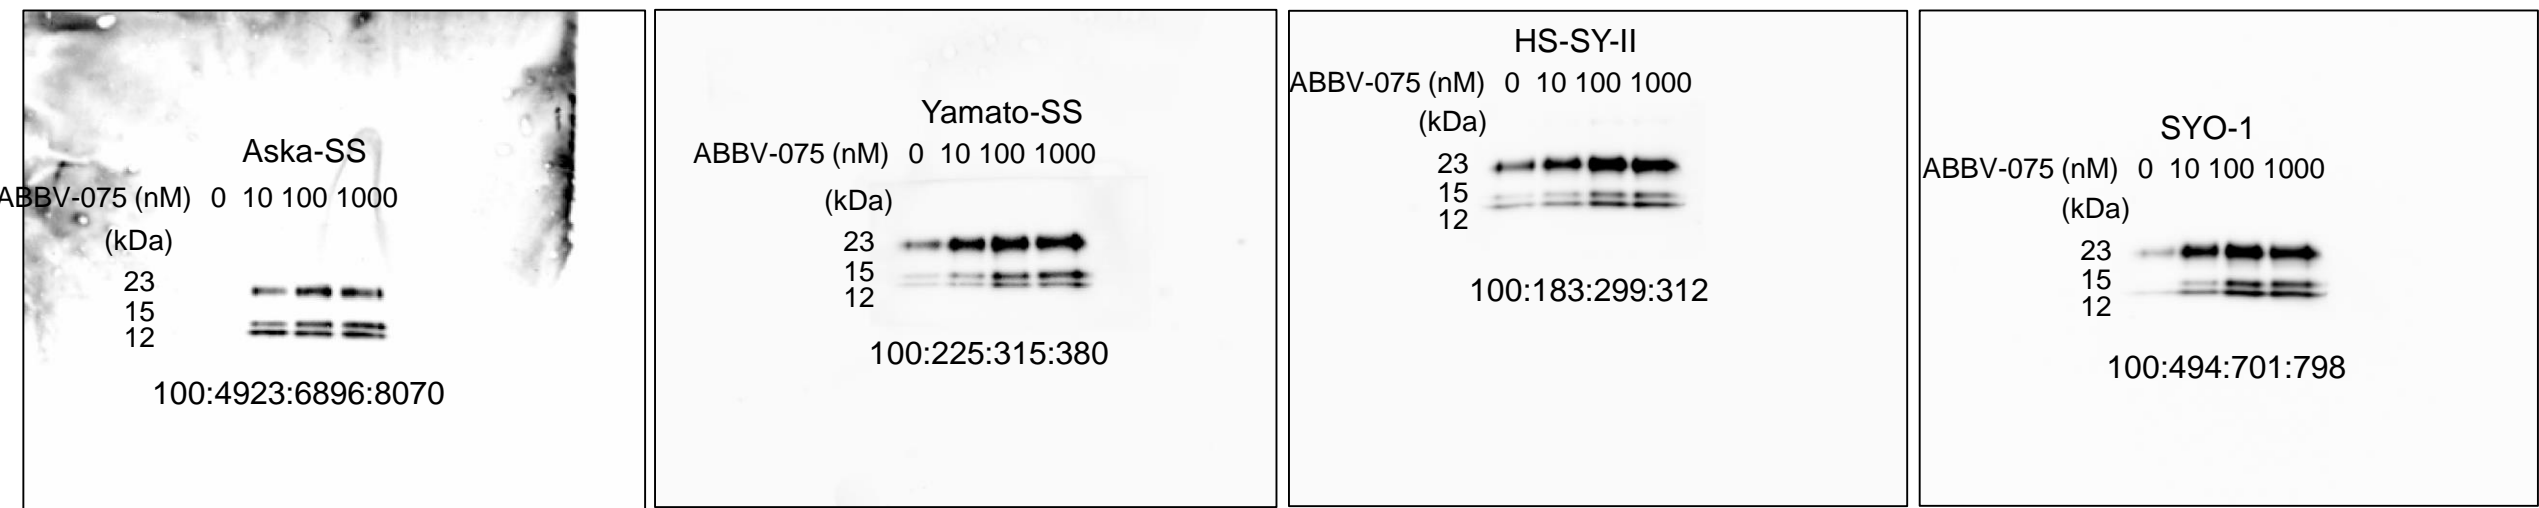

PUMA

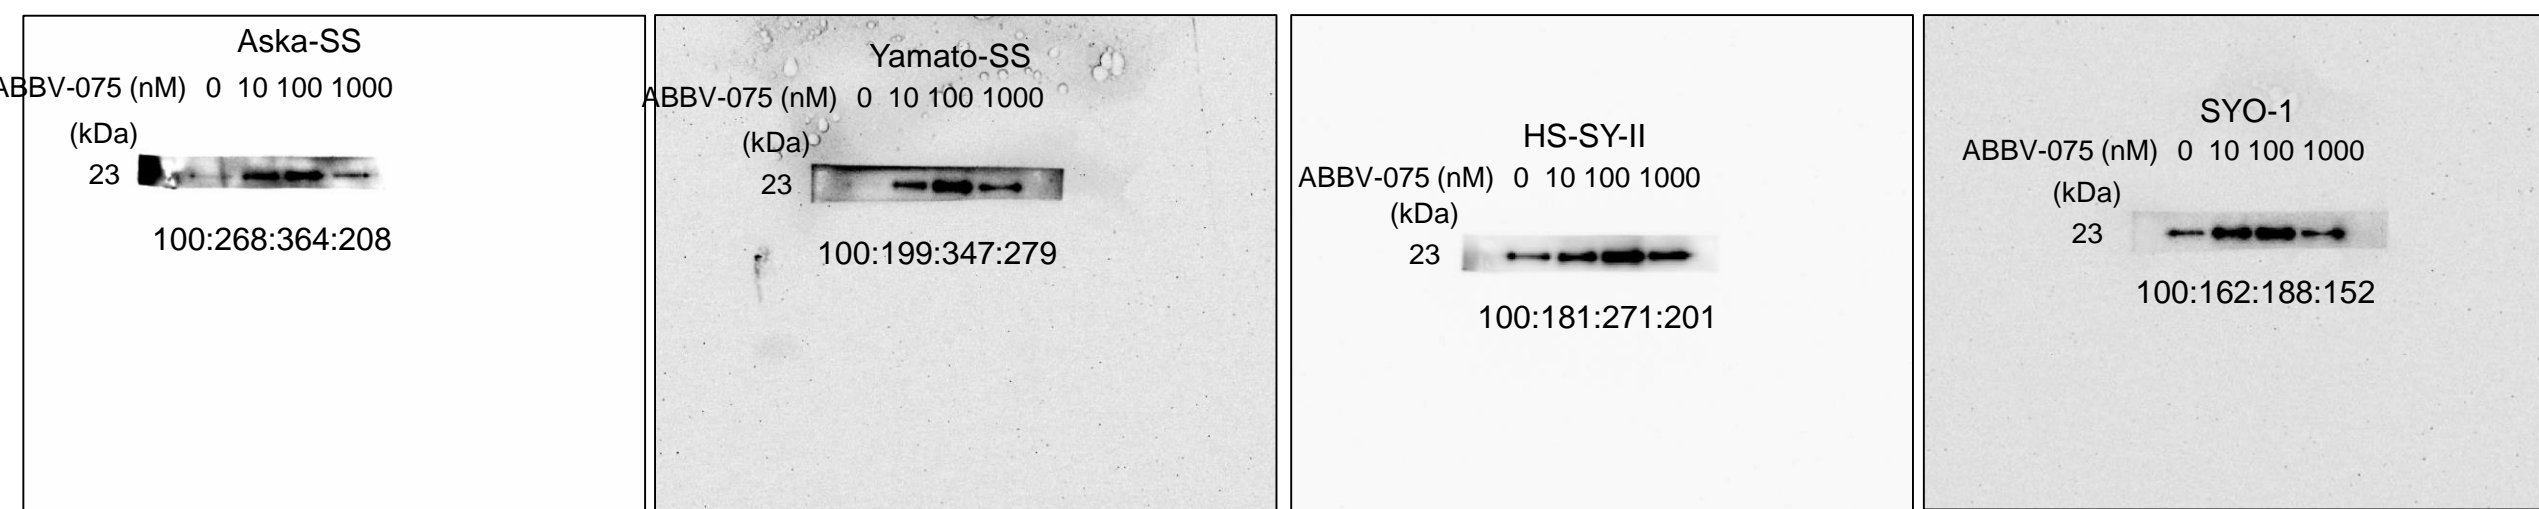

Figure 4D.

$\beta$ -Action

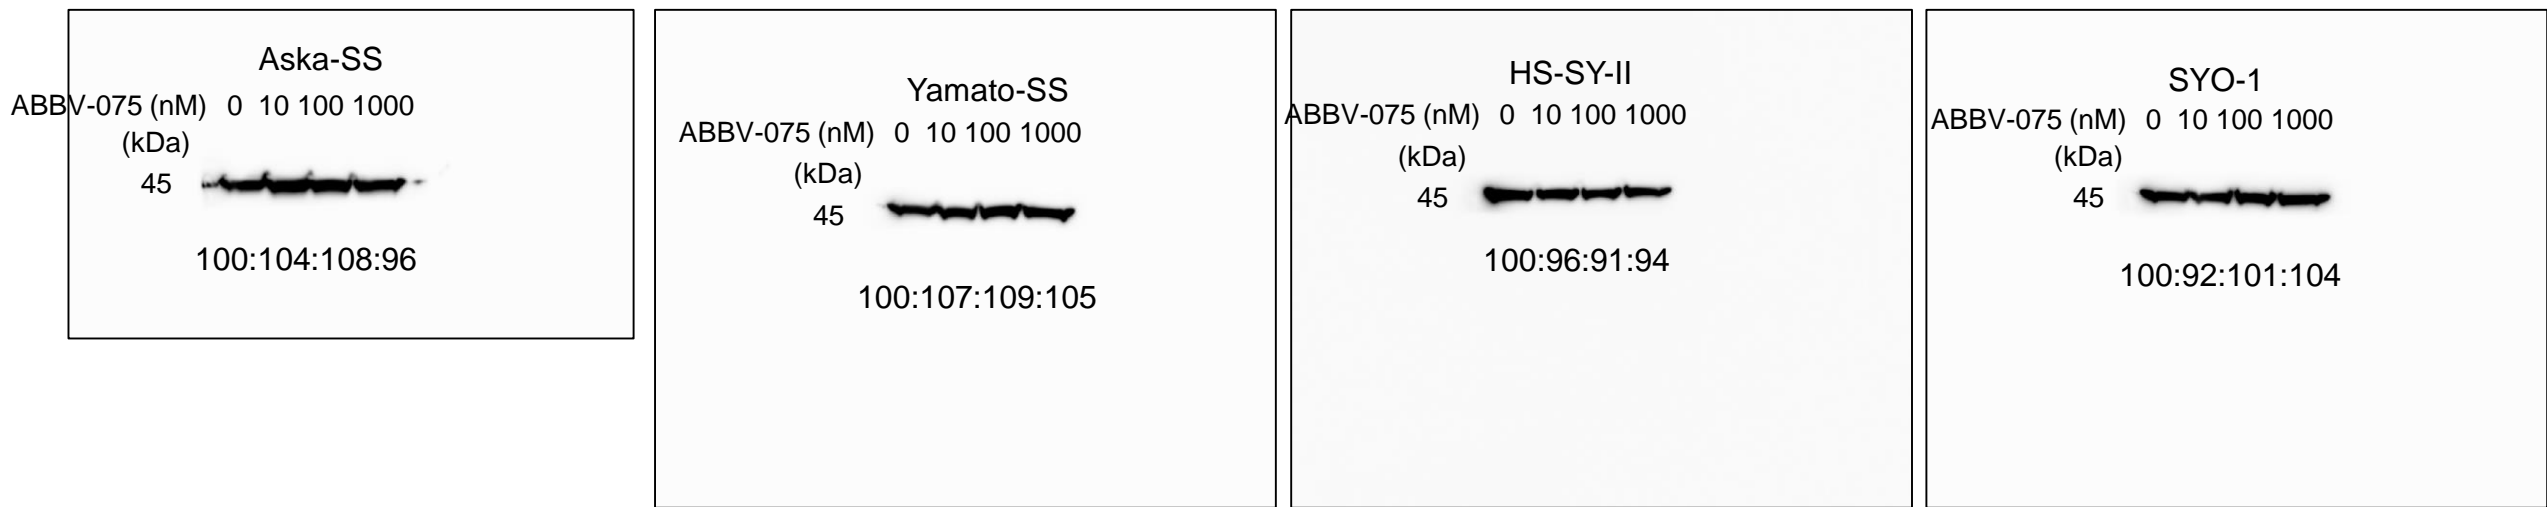



Figure 5E.

## SS18-SSX

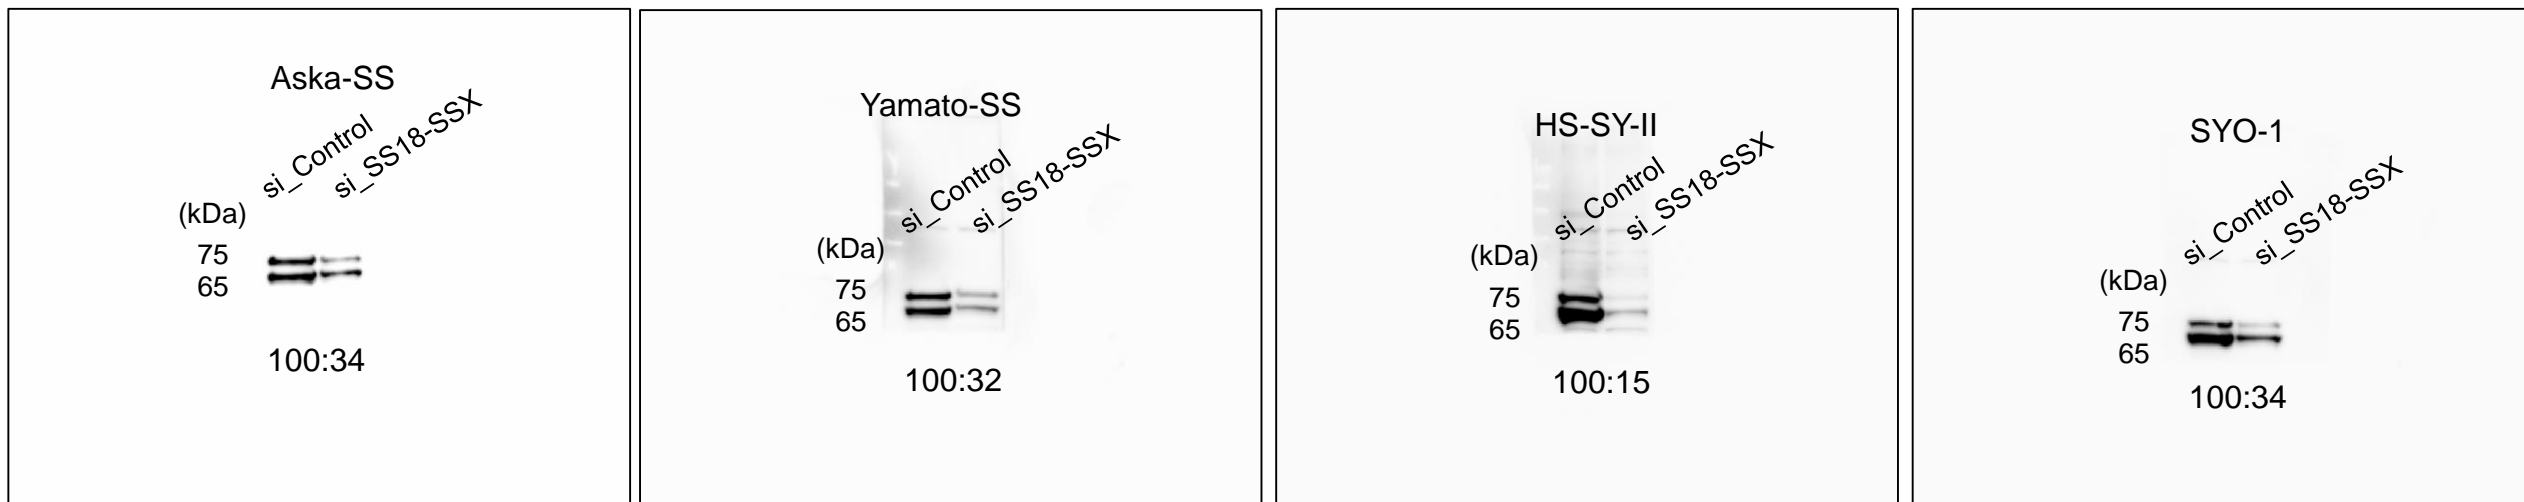

## BCL2

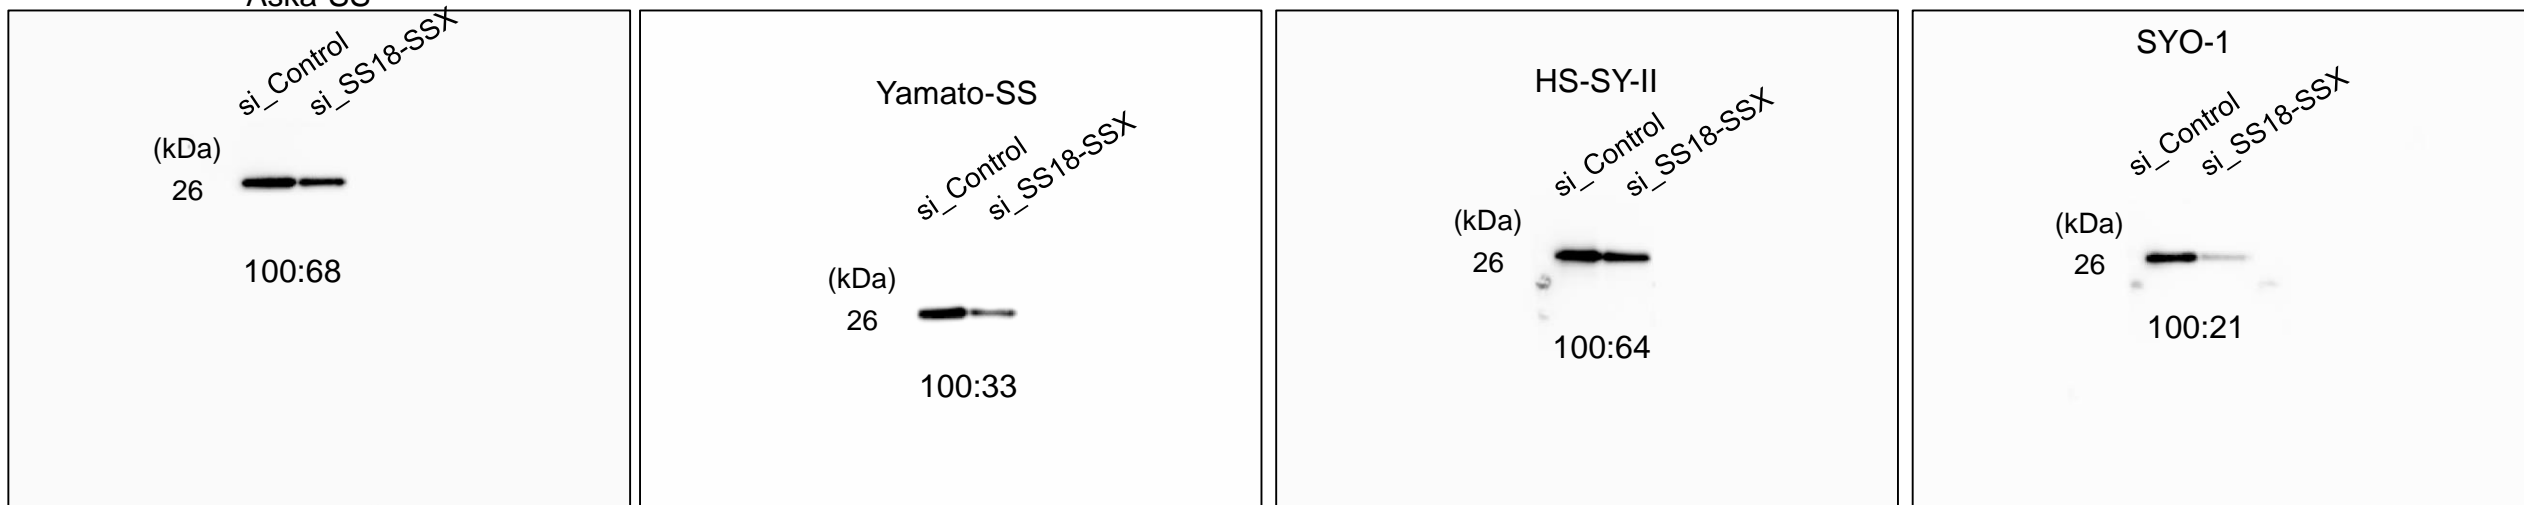

Figure 5E.

BCLxL

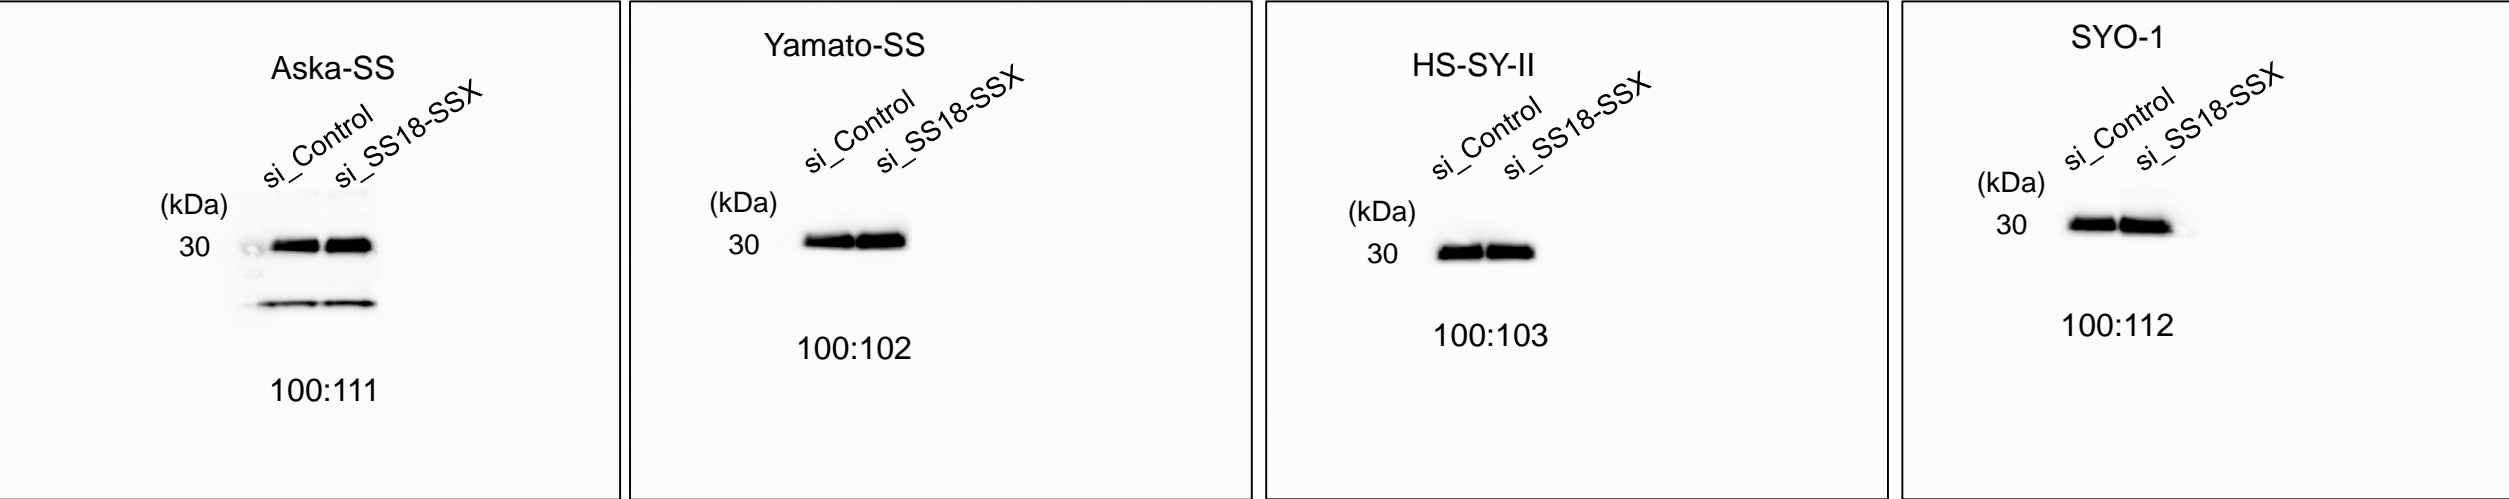

BIM

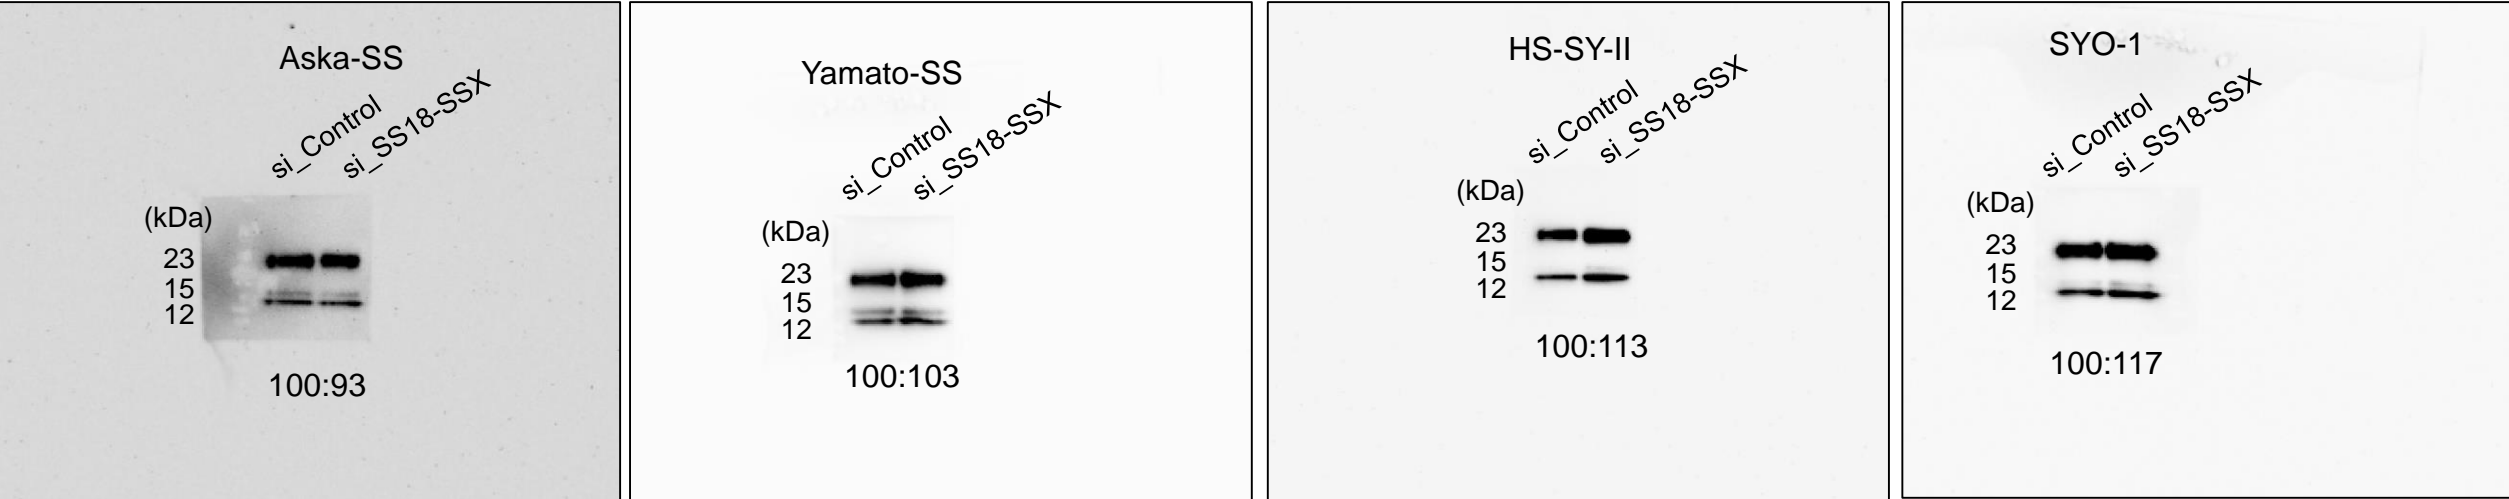

Figure 5E.

$\beta$ -Actin

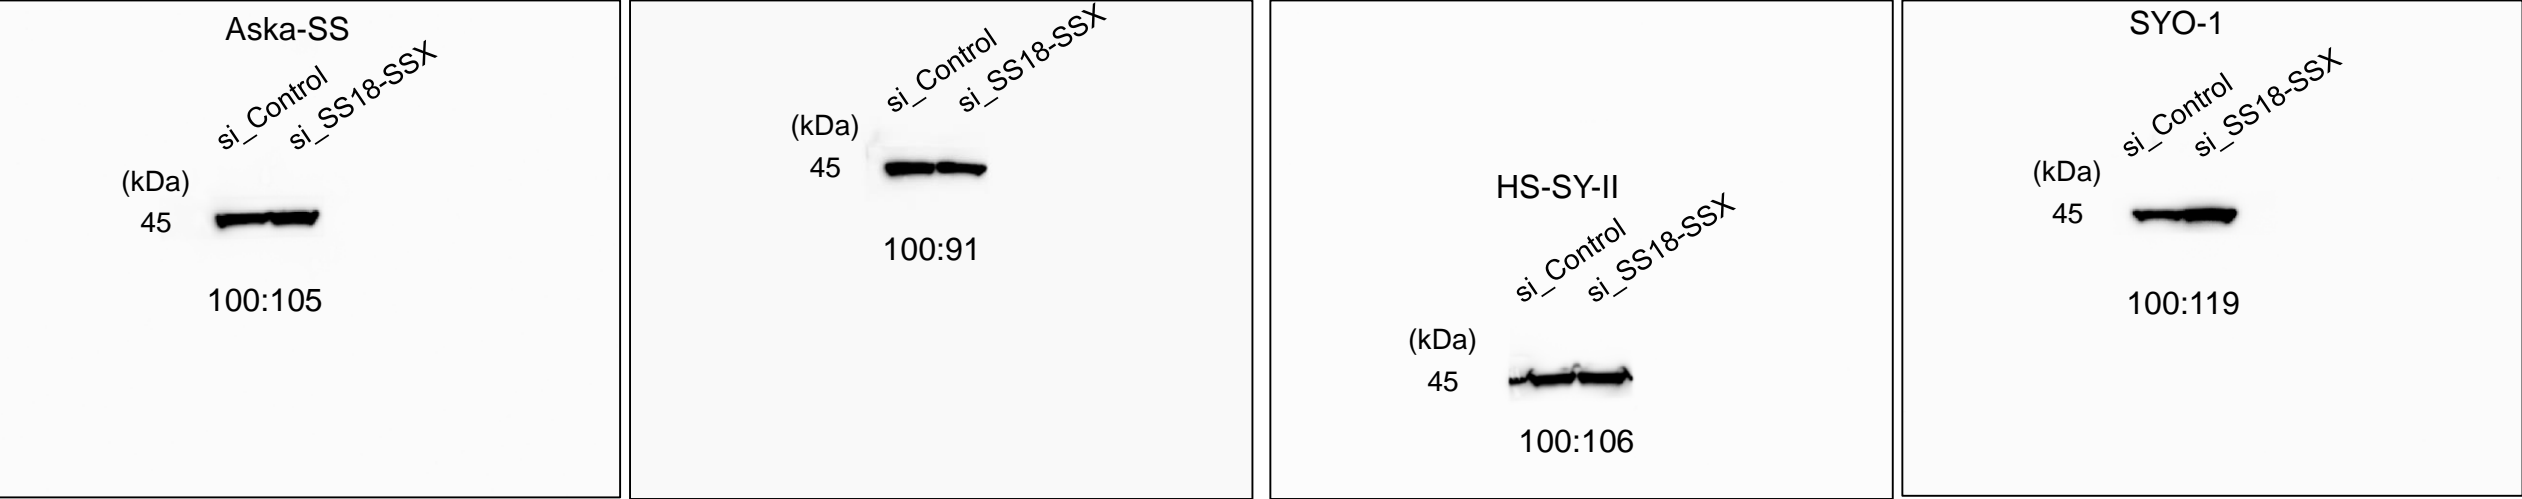

Supplement: s1 [file s1]
