# Supplementary material for: Therapeutic Potential of Bromodomain and Extra-Terminal Domain Inhibitors for Synovial Sarcoma Cells
Source: MDPI journal article supplement (doi:10.3390/cancers16061125), 2024-03-11
Supplement: s1 [file s1]

## Supplementary Information

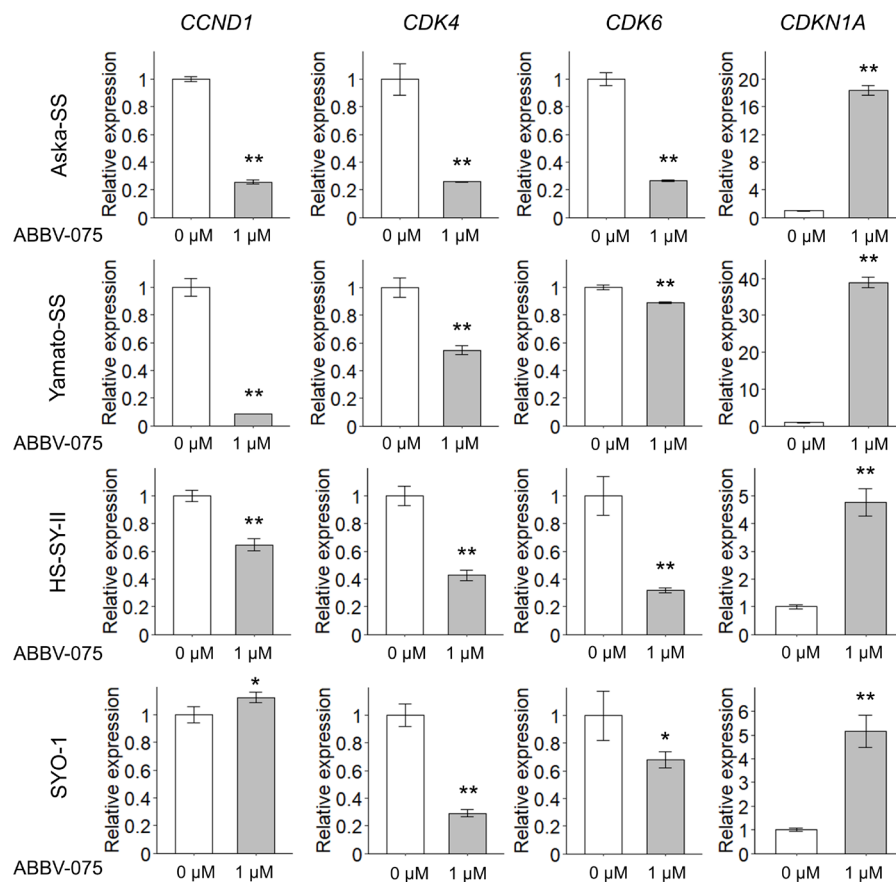

Supplementary Figure S1. mRNA expressions of cell cycle regulators, CCND1, CDK4, CDK6, and CDKN1A, of four synovial sarcoma cell lines treated with 0  $\mu$ M and 1  $\mu$ M of ABBV-075 examined using quantitative polymerase chain reaction. Data are represented as means  $\pm$  standard deviation. \*, P < 0.05; \*\*, P < 0.01 (Student's *t*-test).

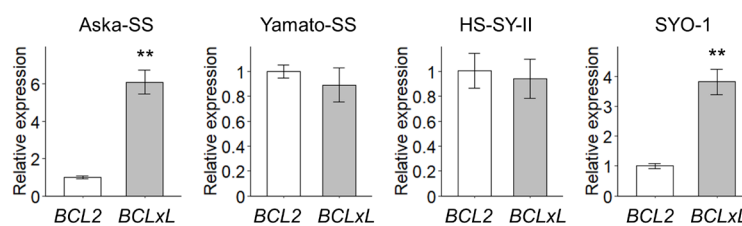

Supplementary Figure S2. mRNA expressions of BCLxL compared with BCL2 in four synovial sarcoma cell lines examined using quantitative polymerase chain reaction. Data are represented as means  $\pm$  standard deviation. \*\*, P < 0.01 (Student's *t*-test).
